# Supplementary material for: In Vitro Model for Hepatotoxicity Studies Based on Primary Human Hepatocyte Cultivation in a Perfused 3D Bioreactor System
Source: MDPI journal article supplement (doi:10.3390/ijms17040584), 2016-04-16
Supplement: s1 [file s1]

# Supplementary Materials: *In Vitro* Model for Hepatotoxicity Studies Based on Primary Human Hepatocyte Cultivation in a Perfused 3D Bioreactor System

Fanny Knöspel, Frank Jacobs, Nora Freyer, Georg Damm, An De Bondt, Ilse van den Wyngaert, Jan Snoeys, Mario Monshouwer, Marco Richter, Nadja Strahl, Daniel Seehofer and Katrin Zeilinger

**Table S1.** Overview of the genes differentially expressed between hepatocyte donors in control bioreactors on Day 10 (LogFC: Log<sub>2</sub> fold change in expression).

| Entrez-ID | Symbol          | Gene Name                                              | logFC | Adjusted <i>p</i> -Value |
|-----------|-----------------|--------------------------------------------------------|-------|--------------------------|
| 397       | <i>ARHGDIB</i>  | Rho GDP dissociation inhibitor (GDI) $\beta$           | 1.35  | 0.046                    |
| 1551      | <i>CYP3A7</i>   | Cytochrome P450, family 3, subfamily A, polypeptide 7  | 3.94  | 0.046                    |
| 4072      | <i>EPCAM</i>    | Epithelial cell adhesion molecule                      | 2.40  | 0.046                    |
| 4495      | <i>MT1G</i>     | Metallothionein 1G                                     | -4.92 | 0.046                    |
| 4496      | <i>MT1H</i>     | Metallothionein 1H                                     | -5.85 | 0.0076                   |
| 30001     | <i>ERO1L</i>    | ERO1-like (S. cerevisiae)                              | 1.05  | 0.0092                   |
| 51302     | <i>CYP39A1</i>  | Cytochrome P450, family 39, subfamily A, polypeptide 1 | 1.075 | 0.0060                   |
| 57600     | <i>FNIP2</i>    | Folliculin interacting protein 2                       | -0.74 | 0.039                    |
| 64097     | <i>EPB41L4A</i> | Erythrocyte membrane protein band 4.1 like 4A          | 1.73  | 0.021                    |
| 79668     | <i>PARP8</i>    | Poly (ADP-ribose) polymerase family, member 8          | 0.79  | 0.032                    |
| 118663    | <i>BTBD16</i>   | BTB (POZ) domain containing 16                         | 1.17  | 0.046                    |

**Table S2.** Overview of the genes most significantly affected upon treatment with 300  $\mu$ M diclofenac (LogFC: Log<sub>2</sub> fold change in expression as compared with control BR).

| Entrez-ID                         | Symbol           | Gene Name                                                                                 | logFC | Adjusted <i>p</i> -Value |
|-----------------------------------|------------------|-------------------------------------------------------------------------------------------|-------|--------------------------|
| <b>Top 10 Downregulated Genes</b> |                  |                                                                                           |       |                          |
| 3108                              | <i>HLA-DMA</i>   | Major histocompatibility complex, class II, DM $\alpha$                                   | -2.01 | 0.00025                  |
| 3240                              | <i>HP</i>        | Haptoglobin                                                                               | -1.76 | 0.00025                  |
| 7805                              | <i>LAPTM5</i>    | Lysosomal protein transmembrane 5                                                         | -1.82 | 0.00025                  |
| 11010                             | <i>GLIPR1</i>    | GLI pathogenesis-related 1                                                                | -2.13 | 0.00052                  |
| 2207                              | <i>FCER1G</i>    | Fc fragment of IgE, high affinity I, receptor for; gamma polypeptide                      | -2.22 | 0.00055                  |
| 51156                             | <i>SERPINA10</i> | Serpin peptidase inhibitor, clade A ( $\alpha$ -1 antiproteinase, antitrypsin), member 10 | -2.19 | 0.00055                  |
| 6659                              | <i>SOX4</i>      | SRY (sex determining region Y)-box 4                                                      | -1.97 | 0.00055                  |
| 6696                              | <i>SPP1</i>      | Secreted phospho protein 1                                                                | -2.86 | 0.00055                  |
| 713                               | <i>C1QB</i>      | Complement component 1, q subcomponent, B chain                                           | -1.97 | 0.00059                  |
| 6347                              | <i>CCL2</i>      | Chemokine (C-C motif) ligand 2                                                            | -4.20 | 0.00065                  |
| <b>Top 10 Upregulated Genes</b>   |                  |                                                                                           |       |                          |
| 337                               | <i>APOA4</i>     | Apolipoprotein A-IV                                                                       | 4.075 | 0.00025                  |
| 771                               | <i>CA12</i>      | Carbonic anhydrase XII                                                                    | 1.47  | 0.00055                  |
| 1491                              | <i>CTH</i>       | Cystathionine gamma-lyase                                                                 | 2.55  | 0.00085                  |
| 1649                              | <i>DDIT3</i>     | DNA-damage-inducible transcript 3                                                         | 2.27  | 0.0017                   |
| 3934                              | <i>LCN2</i>      | Lipocalin 2                                                                               | 3.050 | 0.0022                   |
| 2673                              | <i>GFPT1</i>     | Glutamine-fructose-6-phosphate transaminase 1                                             | 1.74  | 0.0024                   |
| 4953                              | <i>ODC1</i>      | Ornithine decarboxylase 1                                                                 | 1.76  | 0.0033                   |
| 6520                              | <i>SLC3A2</i>    | Solute carrier family 3 (amino acid transporter heavy chain), member 2                    | 2.41  | 0.0033                   |
| 3376                              | <i>IARS</i>      | Isoleucyl-tRNA synthetase                                                                 | 1.25  | 0.0035                   |
| 84513                             | <i>PPAPDC1B</i>  | Phosphatidic acid phosphatase type 2 domain containing 1B                                 | 1.11  | 0.0036                   |

**Table S3.** Overview of the genes most significantly affected upon treatment with 1000  $\mu$ M diclofenac (LogFC: Log<sub>2</sub> fold change in expression as compared with control BR).

| Entrez-ID                         | Symbol          | Gene Name                                                                        | logFC  | Adjusted p-Value       |
|-----------------------------------|-----------------|----------------------------------------------------------------------------------|--------|------------------------|
| <b>Top 10 Downregulated Genes</b> |                 |                                                                                  |        |                        |
| 7805                              | <i>LAPTM5</i>   | Lysosomal protein transmembrane 5                                                | −6.036 | $1.13 \times 10^{-11}$ |
| 1974                              | <i>EIF4A2</i>   | Eukaryotic translation initiation factor 4A2                                     | −6.028 | $2.09 \times 10^{-10}$ |
| 3015                              | <i>H2AFZ</i>    | H2A histone family, member Z                                                     | −5.44  | $2.31 \times 10^{-10}$ |
| 4069                              | <i>LYZ</i>      | Lysozyme                                                                         | −5.30  | $8.70 \times 10^{-11}$ |
| 5516                              | <i>PPP2CB</i>   | Protein phosphatase 2, catalytic subunit, $\beta$ isozyme                        | −5.71  | $2.38 \times 10^{-10}$ |
| 7941                              | <i>PLA2G7</i>   | Phospholipase A2, group VII (platelet-activating factor acetylhydrolase, plasma) | −4.72  | $1.32 \times 10^{-10}$ |
| 11342                             | <i>RNF13</i>    | Ring fingerprotein 13                                                            | −4.89  | $2.75 \times 10^{-10}$ |
| 6166                              | <i>RPL36AL</i>  | Ribosomal protein L36a-like                                                      | −5.56  | $4.64 \times 10^{-10}$ |
| 9516                              | <i>LITAF</i>    | Lipopolysaccharide-induced TNF factor                                            | −4.41  | $4.48 \times 10^{-10}$ |
| 5431                              | <i>POLR2B</i>   | Polymerase (RNA) II (DNA directed) polypeptide B, 140 kDa                        | −4.24  | $5.60 \times 10^{-10}$ |
| <b>Top 10 Upregulated Genes</b>   |                 |                                                                                  |        |                        |
| 1178                              | <i>CLC</i>      | Charcot-Leyden crystal galectin                                                  | 2.61   | $9.02 \times 10^{-6}$  |
| 644809                            | <i>C15orf56</i> | Chromosome 15 open readingframe 56                                               | 1.85   | $1.07 \times 10^{-5}$  |
| 203076                            | <i>C8orf74</i>  | Chromosome 8 open readingframe 74                                                | 1.38   | $1.62 \times 10^{-5}$  |
| 3456                              | <i>IFNB1</i>    | Interferon, $\beta$ 1, fibroblast                                                | 1.66   | $1.83 \times 10^{-5}$  |
| 91544                             | <i>UBXN11</i>   | UBX domain protein 11                                                            | 1.41   | $2.19 \times 10^{-5}$  |
| 56253                             | <i>CRTAM</i>    | Cytotoxic and regulatory T cell molecule                                         | 1.18   | $2.28 \times 10^{-5}$  |
| 1133                              | <i>CHRM5</i>    | Cholinergic receptor, muscarinic 5                                               | 1.224  | $2.67 \times 10^{-5}$  |
| 5319                              | <i>PLA2G1B</i>  | Phospholipase A2, group IB (pancreas)                                            | 1.27   | $3.14 \times 10^{-5}$  |
| 9153                              | <i>SLC28A2</i>  | Solute carrier family 28 (concentrative nucleoside transporter), member 2        | 1.33   | $3.14 \times 10^{-5}$  |
| 84560                             | <i>MT4</i>      | Metallothionein 4                                                                | 1.60   | $3.26 \times 10^{-5}$  |

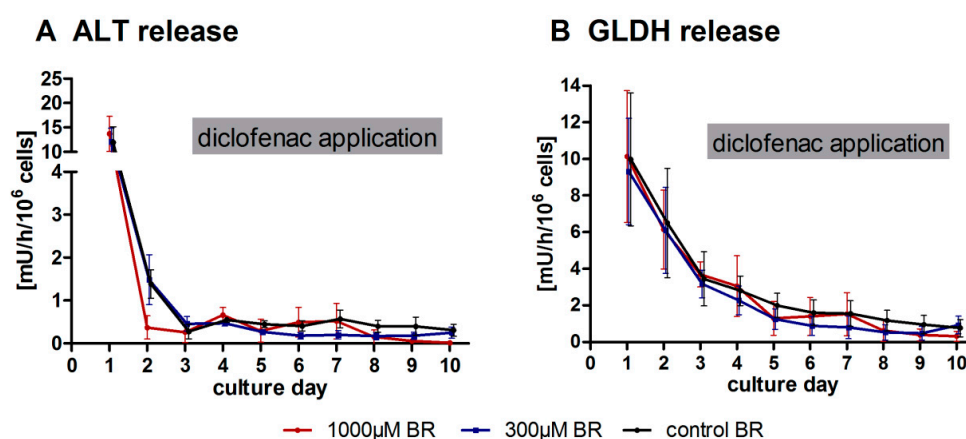**Figure S1.** Release rates of alanine transaminase (ALT) and glutamate dehydrogenase (GLDH) in bioreactor with primary human liver cells treated or non-treated with diclofenac. Enzyme release rates in 300  $\mu$ M bioreactors (300  $\mu$ M BR) (blue) or 1000  $\mu$ M bioreactors (1000  $\mu$ M BR) (red) or in the non-treated control bioreactors (control BR) (black) were determined before (from Day 0 to 3) and during diclofenac application (from Day 3 to 10). ALT (A) and GLDH (B) were measured as indicators of potential cell damage. Values were normalized to  $10^6$  inoculated cells. The influence of the drug dose (Day 3–10) on the metabolic activity of the cells in comparison to the control was analyzed by means of one-way analysis of variance (ANOVA) with Dunnett's multiple comparison test. ( $n = 3$ , mean  $\pm$  SEM).
